# Supplementary material for: PRC2 is dispensable for HOTAIR‐mediated transcriptional repression
Source: PubMed Central journal article supplement — EMBO J. 2017 Feb 6;36(8):981–94. doi: 10.15252/embj.201695335 (PMC5391141; doi:10.15252/embj.201695335), 2017-02-06
Supplement: EMBJ-36-981-s001.pdf [file EMBJ-36-981-s001.pdf]

# **PRC2 is dispensable for *HOTAIR*-mediated transcriptional repression.**

Manuela Portoso, Roberta Ragazzini, Živa Brenčič, Arianna Moiani, Audrey Michaud,  
Ivaylo Vassilev, Michel Wassef, Nicolas Servant, Bruno Sargueil and Raphaël  
Margueron.

## **Appendix**

**Content:**

**Tables S1 to S3 and respective legend.**

| <b>Sample</b>              | <b>Library</b> | <b>Total reads</b> | <b>Mapped reads</b> | <b>% Mapped</b> |
|----------------------------|----------------|--------------------|---------------------|-----------------|
| B130T3_wt1                 | 100 bp PE      | 103,335,602        | 77,922,669          | 75.41%          |
| B130T4_wt2                 | 100 bp PE      | 115,487,294        | 88,459,074          | 76.60%          |
| B130T5_ezh2-/-1            | 100 bp PE      | 101,006,669        | 75,153,717          | 74.40%          |
| B130T6_ezh2-/-2            | 100 bp PE      | 91,670,800         | 69,708,128          | 76.04%          |
| B130T7_wt +hotair1         | 100 bp PE      | 90,196,578         | 67,304,498          | 74.62%          |
| B130T8_wt +hotair2         | 100 bp PE      | 74,599,977         | 56,660,718          | 75.95%          |
| B130T9_ezh2-/- +hotair1    | 100 bp PE      | 91,955,265         | 67,997,257          | 73.95%          |
| B130T10_ezh2-/- + hotair 2 | 100 bp PE      | 88,585,080         | 66,982,306          | 75.61%          |

**Appendix Table S1. RNA- sequencing library dataset.**

Table indicating sequenced sample names, type of library, number of total sequenced reads, number of mapped reads to human hg19 genome and percentage of mapped reads.

| <b>qChIP primers</b> | <b>Forward</b>          | <b>Reverse</b>          |
|----------------------|-------------------------|-------------------------|
| LUC A                | ATGGAAGACGCCAAAAACAT    | GCCTTATGCAGTTGCTCTCC    |
| LUC D                | GTGTTGGGCGCGTTATTTAT    | TACGGTAGGCTGCGAAATGT    |
| LUC E                | AACACCCCAACATCTTCGAC    | TCGCGGTTGTTACTTGACTG    |
| ACTIN                | TGCTATCCCTGTACGCCTCT    | CTCCTTAATGTCACGCACGA    |
| MYT1                 | AGGCACCTTCTGTTGGCCGA    | AGGCAGCTGCCTCCCGTACA    |
| IRX4                 | AGCGTGTCTTTTCATAGGTC    | TTTAGTCACCCGAGAACGAG    |
| GAPDH                | CGGGATTGTCTGCCCTAATTAT  | GCACGGAAGGTCACGATGT     |
| MYOD                 | TGCCCTGACGCTCTAAGCTTTCT | AGCGGCTGTAGAAATCAGGTCGT |

| <b>qRT-PCR primers</b> | <b>Forward</b>              | <b>Reverse</b>            |
|------------------------|-----------------------------|---------------------------|
| <i>HOTAIR</i>          | GGTAGAAAAAGCAACCACGAA<br>GC | ACATAAACCTCTGTCTGTGAGTGCC |
| U1                     | ATACTTACCTGGCAGGGGAG        | CAGGGGGAAAGCGCGAACGCA     |
| MS2LOOP                | TTCTGCAGATATCCAGCACAGT      | CAACAGATGGCTGGCAACTAGAAG  |

| <b>bisulfite primers</b>          | <b>Forward</b>                     | <b>Reverse</b>                     |
|-----------------------------------|------------------------------------|------------------------------------|
| tkluc-bis-1 (1 <sup>st</sup> PCR) | TAATTAATGTGAGTTAGTTTATT<br>TATTAGG | TATAAAAAACAATTATCCAAAAACC<br>AAAAC |
| tkluc-bis-2 (2 <sup>nd</sup> PCR) | TGAGTTAGTTTATTTATTAGGTA<br>TTTTAGG | TCTTCATAACCTTATACAATTACTCT<br>CC   |

**Appendix Table S2. List of primers used.**

| <b>Antibody</b>   | <b>Reference</b>        | <b>Assay</b> |
|-------------------|-------------------------|--------------|
| mGAL4 (DBD) RK5C1 | Santa Cruz<br>sc-510    | WB           |
| H3                | Active motif<br>39163   | WB           |
| H3K36me3          | Abcam<br>ab9050         | ChIP         |
| EZH2              | homemade                | WB           |
| GAL4              | Millipore<br>06-262     | ChIP, RIP    |
| H3K27me3          | Abcam<br>ab6002         | ChIP, WB     |
| H3K27me3          | Cell signalling<br>9733 | ChIP         |
| FLAG M2 beads     | Sigma Aldrich<br>A2220  | IP           |
| Lamin B1          | Abcam<br>ab16048        | WB           |
| SUZ12             | homemade                | WB           |
| EED               | homemade                | WB           |
| RNA-PolIII (N20)  | Santa Cruz<br>Sc-899    | ChIP         |
| H3K9me2           | Abcam<br>ab1220         | ChIP         |
| H3K27ac           | Abcam<br>ab4729         | ChIP         |

**Appendix Table S3. List of antibodies used.**
